# Supplementary material
Source: PubMed Central journal article supplement (PMC3465430)
Supplement: 1206683109_pnas.201206683SI.pdf [file 1206683109_pnas.201206683SI.pdf]

# Supporting Information

Beauchemin et al. 10.1073/pnas.1206683109

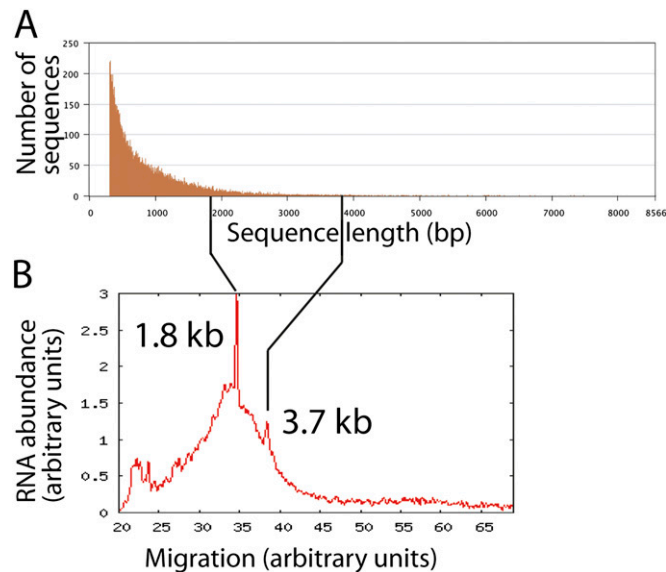

**Fig. S1.** Size distribution of sequences in the transcriptome and in the mRNA. (A) The size distribution plotted as a histogram of number of sequences for each contig length in the 74,655-sequence transcriptome. (B) The size distribution of the RNA sample used for sequencing as determined using a Bioanalyzer. The sizes of the two peaks of rRNA still visible in the analysis are shown.

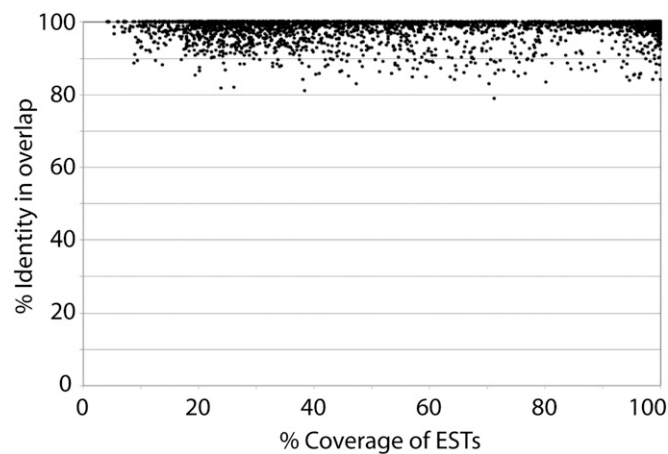

**Fig. S2.** Degree of sequence identity of *Lingulodinium* ESTs with the transcriptome. The degree of sequence identity as a function of the proportion of the EST sequence covered is shown by a comparison of the transcriptome sequences with 2,111 GC-rich *Lingulodinium* ESTs in GenBank. Each point represents a Sanger EST with a corresponding sequence in the transcriptome. Because of the short average length of the transcriptome sequences, there are many ESTs that are incompletely covered by the transcriptome contigs, and several ESTs have matches with more than one contig.





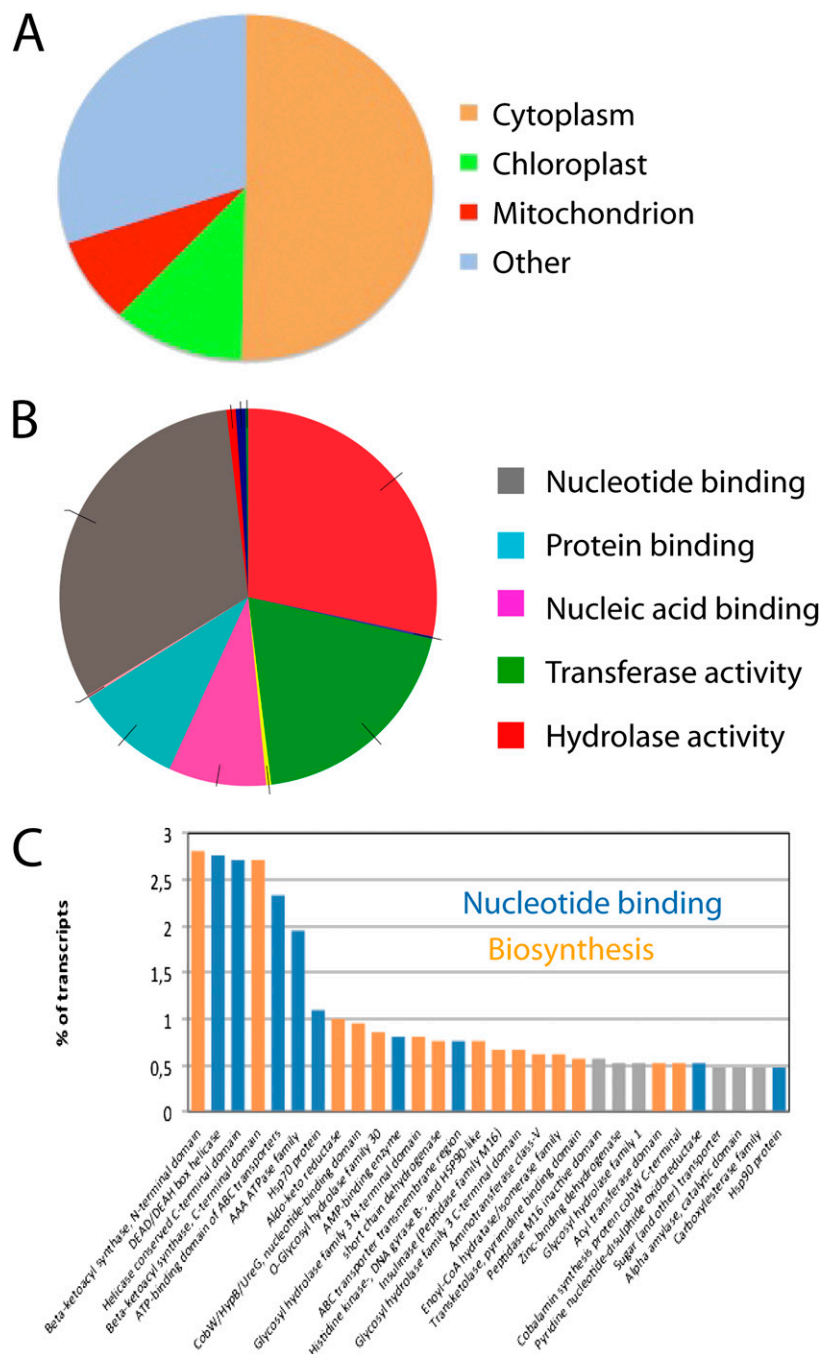

**Fig. S5.** Characteristics of the bacterial-like sequence in the transcriptome. (A) Of 2,354 sequences identified as putative bacterial sequences, 414 had an annotated match to GenBank. The annotated sequences were classified into the gene ontology compartment categories cytoplasm, mitochondrion, chloroplast, or all other membrane-bound compartments. (B) Functional classification shows enrichment of sequence in nucleotide-binding and enzymatic gene ontology categories. (C) The 30 most abundant protein family domains include principally nucleotide-binding and biosynthetic functions.



**Table S2. Number of KEGG pathway sequences found in mammals, plants, alveolata, and diatoms for replication, transcription, splicing, and translation**

| Process             | Subunit                       | Mammals/<br>plants  |       | Alveolata* |       |       | Diatoms<br>Thaps |
|---------------------|-------------------------------|---------------------|-------|------------|-------|-------|------------------|
|                     |                               | Homsa               | Arath | Plafa      | Linpo | Tetth |                  |
| DNA replication     | DNA polymerase                |                     |       |            |       |       |                  |
|                     | α Complex                     | 4                   | 4     | 4          | 4     | 4     | 4                |
|                     | δ Complex                     | 4                   | 4     | 2          | 2     | 2     | 2                |
|                     | ε Complex                     | 4                   | 2     | 2          | 2     | 2     | 3                |
|                     | MCM complex                   | 6                   | 6     | 6          | 6     | 6     | 6                |
|                     | RPA                           | 3                   | 2     | 1          | 1     | 1     | 2                |
|                     | Clamp/loader                  | 4                   | 4     | 4          | 4     | 4     | 4                |
|                     | Other                         |                     |       |            |       |       |                  |
|                     | Helicase                      | 1                   | 1     | 0          | 1     | 1     | 0                |
|                     | RNaseH1                       | 3                   | 3     | 1          | 0     | 3     | 1                |
|                     | Fen1                          | 1                   | 1     | 1          | 1     | 1     | 1                |
|                     | DNA ligase                    | 1                   | 1     | 1          | 1     | 1     | 1                |
| Transcription       | RNA polymerase I, II, and III |                     |       |            |       |       |                  |
|                     | Core                          | 10                  | 9     | 10         | 10    | 9     | 10               |
|                     | Specific                      | 13                  | 12    | 6          | 6     | 6     | 10               |
|                     | Common                        | 5                   | 5     | 4          | 5     | 4     | 4                |
|                     | Basal transcription factors   |                     |       |            |       |       |                  |
|                     | TFIIA                         | 2                   | 2     | 0          | 0     | 0     | 0                |
|                     | TFIIB                         | 1                   | 1     | 1          | 0     | 0     | 0                |
|                     | TFIID                         | 15                  | 10    | 1          | 1     | 3     | 4                |
|                     | TBP                           | 1                   | 1     | 1          | 0     | 1     | 1                |
|                     | TFIIE                         | 2                   | 2     | 0          | 0     | 0     | 1                |
|                     | TFIIF                         | 3                   | 2     | 0          | 0     | 0     | 0                |
|                     | TFIIH (NER)                   | 10                  | 10    | 9          | 3     | 5     | 8                |
| Translation         | Ribosome                      |                     |       |            |       |       |                  |
|                     | B                             | 0                   | 7     | 0          | 0     | 1     | 1                |
|                     | B/A/E                         | 47                  | 87    | 40         | 51    | 34    | 48               |
|                     | A/E                           | 25                  | 25    | 20         | 24    | 21    | 23               |
|                     | E                             | 12                  | 12    | 10         | 10    | 8     | 12               |
|                     | aa-tRNA synthesis             |                     |       |            |       |       |                  |
|                     | Enzymes                       | 23                  | 23    | 22         | 22    | 22    | 22               |
|                     | Basic translation factors     |                     |       |            |       |       |                  |
|                     | Initiation                    | 42                  | 57    | 29         | 29    | 33    | 37               |
|                     | Elongation                    | 10                  | 16    | 8          | 9     | 8     | 9                |
|                     | Release                       | 11                  | 11    | 5          | 3     | 7     | 4                |
|                     | Splicing                      | Spliceosome         |       |            |       |       |                  |
| General             |                               | 9                   | 8     | 8          | 9     | 9     | 7                |
| U1                  |                               | 8                   | 7     | 5          | 5     | 5     | 4                |
| U2                  |                               | 12                  | 10    | 7          | 8     | 9     | 10               |
| U4/U6               |                               | 7                   | 7     | 6          | 7     | 7     | 7                |
| U5                  |                               | 8                   | 8     | 6          | 7     | 7     | 7                |
| U5/U4/U6            |                               | 5                   | 5     | 4          | 2     | 4     | 5                |
| Prp19 complex       |                               | 9                   | 8     | 7          | 5     | 7     | 7                |
| Prp19 related       |                               | 9                   | 8     | 8          | 7     | 5     | 8                |
| EJC/TREX            |                               | 6                   | 5     | 4          | 3     | 4     | 5                |
| Common              |                               | 3                   | 3     | 1          | 1     | 2     | 1                |
| Translation related |                               | Ribosome biogenesis |       |            |       |       |                  |
|                     | 90S preribosome               | 18                  | 18    | 6          | 12    | 15    | 14               |
|                     | Nucleus                       | 14                  | 12    | 9          | 10    | 12    | 12               |
|                     | Nucleolus                     | 17                  | 15    | 13         | 14    | 14    | 14               |
|                     | Cytoplasm                     | 7                   | 6     | 5          | 6     | 6     | 6                |
|                     | mRNA transport                |                     |       |            |       |       |                  |
|                     | Nucleus                       | 11                  | 9     | 9          | 7     | 7     | 8                |
|                     | Cytoplasm                     | 6                   | 6     | 2          | 3     | 2     | 3                |
|                     | NPC                           | 34                  | 22    | 3          | 5     | 8     | 13               |
|                     | SMNC                          | 9                   | 2     | 0          | 0     | 0     | 1                |
|                     | eIFs                          | 14                  | 10    | 9          | 9     | 7     | 11               |
|                     | EJC                           | 16                  | 12    | 6          | 9     | 6     | 6                |
| TREX                | 6                             | 6                   | 0     | 0          | 2     | 3     |                  |

**Table S2. Cont.**

| Process | Subunit                   | Mammals/<br>plants |       | Alveolata* |       |       | Diatoms<br>Thaps |
|---------|---------------------------|--------------------|-------|------------|-------|-------|------------------|
|         |                           | Homsa              | Arath | Plafa      | Linpo | Tetth |                  |
|         | mRNA surveillance pathway |                    |       |            |       |       |                  |
|         | Nucleus                   | 34                 | 26    | 9          | 15    | 10    | 17               |
|         | Cytoplasm                 | 15                 | 12    | 8          | 10    | 7     | 9                |
| Total   |                           | 540                | 545   | 323        | 349   | 342   | 396              |

aa, aminoacyl, Arath, *Arabidopsis thaliana*; eIFs, eukaryotic initiation factors; EJC, exon junction complex; Homsa, *Homo sapiens*; Plafa, *Plasmodium falciparum*; Linpo, *Lingulodinium polyedra*; MCM, mini chromosome maintenance; NER, nucleotide excision repair; NPC, nuclear pore complex; RPA, replication protein A; SMNC, survival motor neuron complex; TBP, TATA-binding protein; Tetth, *Tetrahymena thermophila*; TFI, transcription factor II; Thaps, *Thalassiosira pseudonana*; TREX, transcription/export.

\*Apicomplexans, dinoflagellates, and ciliates.

**Table S3. Nuclear- and plastid-encoded reference sequences from GenBank used for comparison of synonymous (dS) and nonsynonymous (dN) mutations**

| Gene name                        | Accession no. | Length (bp) | dS         | dN         |
|----------------------------------|---------------|-------------|------------|------------|
| p43                              | AY423581      | 1,429       | 14 (0.05)  | 33 (0.04)  |
| Phosphoribulokinase              | AY772247      | 1,461       | 64 (0.22)  | 32 (0.03)  |
| Histone-like protein             | AF482694      | 511         | 13 (0.17)  | 18 (0.08)  |
| Luciferase                       | AF085332      | 4,000       | 25 (0.03)  | 45 (0.02)  |
| GAPDH (plastid isoform)          | AF028560      | 1,433       | 150 (0.47) | 35 (0.04)  |
| Actin                            | AY423582      | 1,407       | 59 (0.23)  | 15 (0.02)  |
| RuBisCo                          | GONR15B       | 1,912       | 136 (0.36) | 33 (0.03)  |
| Carbonic anhydrase               | EU044834      | 1,636       | 18 (0.06)  | 23 (0.02)  |
| Cyclin                           | AY618995      | 1,825       | 6 (0.02)   | 30 (0.03)  |
| Cellulase                        | GQ258705      | 1,425       | 40 (0.12)  | 30 (0.03)  |
| Glucose phosphate isomerase      | DQ812892      | 1,875       | 10 (0.03)  | 18 (0.01)  |
| Fructose-1,6-bisphosphatase      | DQ508159      | 1,235       | 12 (0.05)  | 32 (0.04)  |
| Sedoheptulose-1,7-bisphosphatase | DQ508153      | 1,492       | 58 (0.18)  | 44 (0.05)  |
| Superoxide dismutase             | AF289824      | 744         | 21 (0.13)  | 5 (0.01)   |
| Peridinin-chlorophyll a-protein  | JO692699      | 1,127       | 7 (0.025)  | 11 (0.013) |
| Luciferin-binding protein        | GONLBPA       | 2,217       | 37 (0.08)  | 62 (0.04)  |
| psaA                             | DQ264850      | 2,506       | 72 (0.14)  | 273 (0.16) |
| psaB                             | DQ264852      | 2,174       | 41 (0.09)  | 146 (0.09) |
| psbA                             | DQ264844      | 1,074       | 10 (0.04)  | 32 (0.04)  |
| psbB                             | DQ264845      | 1,559       | 29 (0.08)  | 103 (0.09) |
| psbC                             | DQ264846      | 1,418       | 43 (0.17)  | 112 (0.14) |
| psbD                             | DQ264847      | 1,236       | 11 (0.04)  | 55 (0.06)  |
| atpA                             | DQ264853      | 1,609       | 20 (0.06)  | 69 (0.07)  |
| atpB                             | DQ264857      | 771         | 17 (0.10)  | 82 (0.14)  |
| petB                             | DQ264849      | 842         | 21 (0.13)  | 29 (0.06)  |
| petD                             | DQ264848      | 545         | 13 (0.11)  | 48 (0.13)  |

Column dS shows the total number of synonymous changes (ratio of synonymous substitutions per synonymous site) while column dN shows the total number of nonsynonymous changes (ratio nonsynonymous substitutions per nonsynonymous site).
